# Supplementary material for: Self-Perceived Health, Objective Health, and Quality of Life among People Aged 50 and Over: Interrelationship among Health Indicators in Italy, Spain, and Greece
Source: Int J Environ Res Public Health. 2020 Apr 2;17(7):2414. doi: 10.3390/ijerph17072414 (PMC7178192; doi:10.3390/ijerph17072414)
Supplement: Supplementary file 1 [file ijerph-17-02414-s001.xlsx]

## Sheet: Sheet1
Table - Spearman's rank correlation between quantitative variables												Table - Cramer's V between categorical variables
Greece	age	Years of education	Household net income	Household net wort	bmi	NCDs	Fluency	Itest	Dtest	CASP-12		Greece	Living in couple	Current job status	Current smoking status	Physical inactivity	Self-perceived health	Global activity limitation
age	1.00	-0.40	-0.05	-0.09	0.04	0.44	-0.28	-0.44	-0.39	-0.30		Gender	0.21	0.1	0.3	0.003	0.05	0.05
Years of education	-0.40	1.00	0.15	0.21	-0.10	-0.29	0.20	0.29	0.26	0.27		Living in couple		0.03	0.07	0.1	0.17	0.14
Household net income	-0.05	0.15	1.00	0.12	-0.02	-0.02	0.08	0.10	0.11	0.13		Current job status			0.1	0.06	0.2	0.18
Household net wort	-0.09	0.21	0.12	1.00	-0.03	-0.08	0.13	0.11	0.13	0.20		Current smoking status				0.05	0.06	0.07
bmi	0.04	-0.10	-0.02	-0.03	1.00	0.19	0.00	-0.04	-0.04	-0.14		Physical inactivity					0.23	0.26
NCDs	0.44	-0.29	-0.02	-0.08	0.19	1.00	-0.14	-0.26	-0.24	-0.38		Self-perceived health						0.53
Fluency	-0.28	0.20	0.08	0.13	0.00	-0.14	1.00	0.38	0.36	0.20
Itest	-0.44	0.29	0.10	0.11	-0.04	-0.26	0.38	1.00	0.76	0.28		Spain	Living in couple	Current job status	Current smoking status	Physical inactivity	Self-perceived health	Global activity limitation
Dtest	-0.39	0.26	0.11	0.13	-0.04	-0.24	0.36	0.76	1.00	0.30		Gender	0.12	0.05	0.39	0.05	0.09	0.08
CASP-12	-0.30	0.27	0.13	0.20	-0.14	-0.38	0.20	0.28	0.30	1.00		Living in couple		0.02	0.04	0.05	0.06	0.06
												Current job status			0.09	0.14	0.23	0.2
Spain	age	yedu	thinc	hnetw	bmi	chronic	fluency	cf008tot	cf016tot	casp		Current smoking status				0.05	0.06	0.05
age	1.00	-0.33	-0.15	-0.07	-0.02	0.32	-0.34	-0.45	-0.40	-0.26		Physical inactivity					0.26	0.27
Years of education	-0.33	1.00	0.16	0.14	-0.14	-0.22	0.35	0.37	0.37	0.25		Self-perceived health						0.54
Household net income	-0.15	0.16	1.00	0.17	-0.02	-0.05	0.18	0.13	0.13	0.12
Household net wort	-0.07	0.14	0.17	1.00	-0.07	-0.08	0.10	0.10	0.10	0.13		Italy	Living in couple	Current job status	Current smoking status	Physical inactivity	Self-perceived health	Global activity limitation
bmi	-0.02	-0.14	-0.02	-0.07	1.00	0.17	-0.04	-0.03	-0.04	-0.10		Gender	0.14	0.06	0.24	0.06	0.05	0.06
NCDs	0.32	-0.22	-0.05	-0.08	0.17	1.00	-0.21	-0.19	-0.19	-0.36		Living in couple		0.02	0.01	0.07	0.1	0.08
Fluency	-0.34	0.35	0.18	0.10	-0.04	-0.21	1.00	0.45	0.44	0.31		Current job status			0.02	0.1	0.18	0.19
Itest	-0.45	0.37	0.13	0.10	-0.03	-0.19	0.45	1.00	0.72	0.29		Current smoking status				0.01	0.002	0.01
Dtest	-0.40	0.37	0.13	0.10	-0.04	-0.19	0.44	0.72	1.00	0.30		Physical inactivity					0.21	0.22
CASP-12	-0.26	0.25	0.12	0.13	-0.10	-0.36	0.31	0.29	0.30	1.00		Self-perceived health						0.52
												Bold values are statistically significant, P<0.05
Italy	age	yedu	thinc	hnetw	bmi	chronic	fluency	cf008tot	cf016tot	casp
age	1.00	-0.37	-0.07	-0.01	0.03	0.34	-0.28	-0.38	-0.35	-0.20
Years of education	-0.37	1.00	0.21	0.21	-0.14	-0.23	0.34	0.37	0.34	0.26
Household net income	-0.07	0.21	1.00	0.27	-0.04	-0.07	0.12	0.15	0.12	0.15
Household net wort	-0.01	0.21	0.27	1.00	-0.05	-0.06	0.12	0.15	0.11	0.19
bmi	0.03	-0.14	-0.04	-0.05	1.00	0.19	-0.04	-0.08	-0.08	-0.10
NCDs	0.34	-0.23	-0.07	-0.06	0.19	1.00	-0.14	-0.25	-0.23	-0.32
Fluency	-0.28	0.34	0.12	0.12	-0.04	-0.14	1.00	0.36	0.35	0.26
Itest	-0.38	0.37	0.15	0.15	-0.08	-0.25	0.36	1.00	0.71	0.29
Dtest	-0.35	0.34	0.12	0.11	-0.08	-0.23	0.35	0.71	1.00	0.25
CASP-12	-0.20	0.26	0.15	0.19	-0.10	-0.32	0.26	0.29	0.25	1.00
Bold values are statistically significant, P<0.05
